# Supplementary material for: Synthesis, characterization and magnetic properties of head-to-head stacked vanadocenes
Source: Royal Society of Chemistry journal article supplement (doi:10.1039/c7dt03101g), 2017-01-01
Supplement: c7dt03101g1.pdf [file c7dt03101g1.pdf]

## Supporting Information

# Synthesis, Characterization and Magnetic Properties of Head-to-Head Stacked Vanadocenes

Sarah Puhl,<sup>a</sup> Torben Steenbock,<sup>a</sup> Reentje Harms,<sup>a</sup> Carmen Herrmann,<sup>a</sup> and Jürgen Heck<sup>\*a</sup>

<sup>a</sup>Institute of Inorganic and Applied Chemistry, University of Hamburg,  
Martin-Luther-King-Platz 6, 20146 Hamburg, Germany  
*herrmann@chemie.uni-hamburg.de; heck@chemie.uni-hamburg.de*

### Broken-Symmetry structure of **3**

$$E_{\text{tot}} = -3046.31948234331 \text{ a.u.}$$

|   |            |            |             |
|---|------------|------------|-------------|
| V | 5.87133800 | 4.54895000 | 1.56754100  |
| C | 8.04164900 | 5.19458500 | 1.97157700  |
| C | 7.55310900 | 4.46394200 | 3.09336500  |
| C | 7.25834600 | 3.14105900 | 2.67788200  |
| C | 7.54263300 | 3.04278500 | 1.29148600  |
| C | 8.01163200 | 4.30732300 | 0.85259700  |
| H | 8.33513200 | 4.55313000 | -0.14869500 |
| C | 3.83468700 | 5.16533800 | 2.37243400  |
| C | 4.27841400 | 6.17532000 | 1.47928200  |
| H | 4.49878900 | 7.20047400 | 1.73896600  |
| C | 4.39186000 | 5.59839600 | 0.18684800  |
| H | 4.69945100 | 6.11059300 | -0.71332900 |
| C | 4.01860700 | 4.23150500 | 0.28158800  |
| C | 3.67401600 | 3.96402000 | 1.63237000  |
| C | 8.43583700 | 6.61946400 | 1.92946400  |
| H | 7.43702800 | 4.85503400 | 4.09287600  |
| H | 6.87669900 | 2.35045400 | 3.30719500  |
| H | 7.42472700 | 2.16219600 | 0.67678200  |
| H | 3.65410200 | 5.28861300 | 3.43033600  |
| H | 3.99992000 | 3.52059800 | -0.53169800 |
| H | 3.34883000 | 3.01276200 | 2.02791900  |
| C | 7.95866600 | 7.37241100 | 0.86897800  |
| C | 9.19044100 | 7.27682600 | 2.96388600  |
| H | 7.39159900 | 6.86402500 | 0.09627400  |
| C | 8.09904300 | 8.76650000 | 0.80685300  |
| C | 9.94506800 | 6.61942500 | 3.99832400  |
| C | 9.19045300 | 8.71629200 | 2.96391000  |
| H | 7.70515000 | 9.30981300 | -0.04453800 |

|   |             |             |            |
|---|-------------|-------------|------------|
| C | 8.65657700  | 9.43149500  | 1.86638000 |
| C | 10.42224600 | 7.37241100  | 5.05885000 |
| C | 10.33925800 | 5.19460800  | 3.95622600 |
| C | 9.72432000  | 9.43149100  | 4.06142900 |
| H | 8.69867700  | 10.51526900 | 1.88626200 |
| H | 10.98928700 | 6.86405200  | 5.83149800 |
| C | 10.28182500 | 8.76650600  | 5.12088900 |
| V | 12.50956900 | 4.54892900  | 4.36026900 |
| C | 10.82779700 | 4.46396200  | 2.83436900 |
| C | 10.36923000 | 4.30734300  | 5.07522900 |
| H | 9.68220200  | 10.51528300 | 4.04152400 |
| H | 10.67575200 | 9.30982500  | 5.97232700 |
| C | 11.12254900 | 3.14106900  | 3.24991100 |
| C | 10.83827300 | 3.04274700  | 4.63631100 |
| H | 10.04576100 | 4.55311300  | 6.07646600 |
| C | 14.54620100 | 5.16534000  | 3.55537600 |
| C | 14.10248500 | 6.17532700  | 4.44851700 |
| H | 13.88211900 | 7.20046100  | 4.18884800 |
| C | 13.98905000 | 5.59839100  | 5.74094800 |
| H | 13.68146800 | 6.11059200  | 6.64113800 |
| C | 14.36228800 | 4.23148700  | 5.64626100 |
| C | 14.70690200 | 3.96398600  | 4.29538100 |
| H | 10.94389700 | 4.85503000  | 1.83493600 |
| H | 11.50420800 | 2.35046900  | 2.62059600 |
| H | 10.95615000 | 2.16220700  | 5.25098200 |
| H | 14.72678900 | 5.28861700  | 2.49745300 |
| H | 14.38099600 | 3.52060600  | 6.45948300 |
| H | 15.03205700 | 3.01278000  | 3.89987300 |

### Synthesis of bis( $\mu_2$ -chlorido)bis( $(\eta^5$ -cyclopentadienyl)tetrahydrofuranvanadium(II)) (**2**)<sup>[1]</sup>

A mixture of potassium (0.67 g, 17 mmol) and naphthalene (2.2 g, 17 mmol) in thf (35 mL) was stirred at  $-15\text{ }^\circ\text{C}$  for 4.5 h. Solid vanadocene (1.4 g, 7.8 mmol) was added to the green solution and the reaction mixture was allowed to stir 17 h at room temperature. The yellow solution was cooled to  $-78\text{ }^\circ\text{C}$  for 8.5 h leading to precipitation of potassiumcyclopentadienide which was removed *via* filtration. 1,2-Dichloroethane (0.31 mL, 3.9 mmol) was added to the filtrate at  $0\text{ }^\circ\text{C}$  and the mixture was stirred for 30 min. The solvent was removed under reduced pressure and the red residue was extracted with *n*-hexane (40 mL). Addition of thf (1.4 mL, 21 mmol) and 1,2-dichloroethane (0.31 mL, 3.9 mmol) led to crystallization of the desired product at room temperature. The solvent was decanted and the crystals were washed with *n*-pentane (20 mL). The complex **2** was obtained as a violet, crystalline solid (0.95 g, 4.3 mmol, 54% (69%)<sup>[1]</sup>).  $^1\text{H NMR}$  (400 MHz, toluene- $d_8$ ,  $25\text{ }^\circ\text{C}$ )  $\delta = 124.72$  (bs), 3.72 (bs, 4H, thf- $\alpha$ ), 1.52 (bs, 4H, thf- $\beta$ ).  $^1\text{H NMR}$  (400 MHz, thf- $d_8$ ,  $25\text{ }^\circ\text{C}$ )  $\delta = 125.92$  (bs).

Spin densities and MO occupations for different bimetallocene complexes

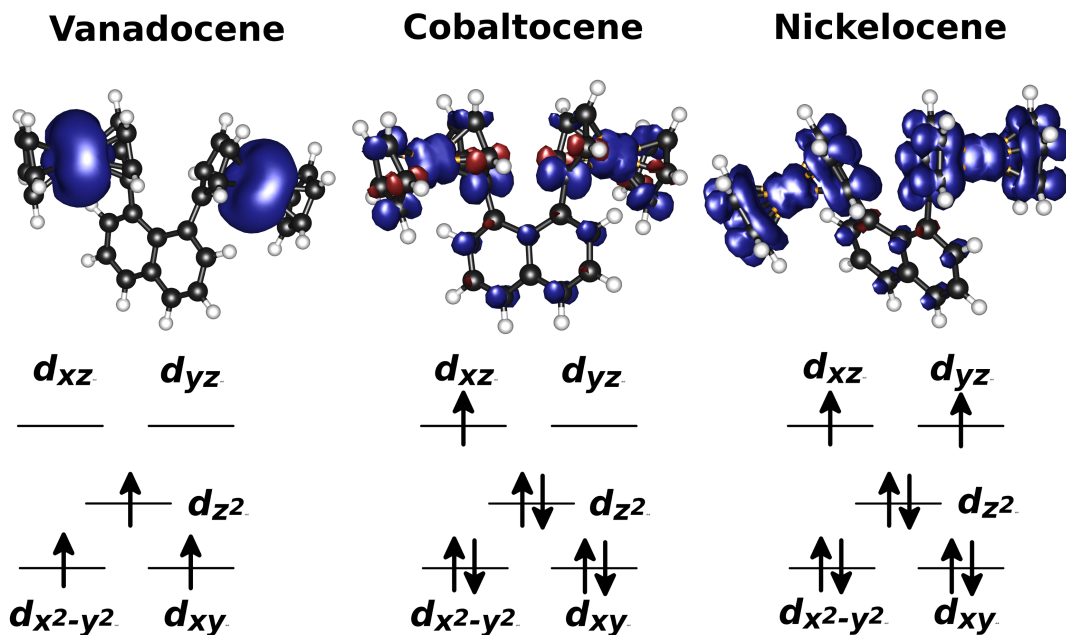

Figure S11: Spin distributions for bimetallocene complexes differing in the central metal ions (top) calculated with TPSSH/def2-TZVP in the high-spin state and occupation schemes of for the  $d$  orbitals in metallocenes (bottom).

## Crystal Parameter

Table S11: Selected interplanar and torsional angles [ $^{\circ}$ ] and interatomic distances [ $\text{\AA}$ ] of **2**,  $[\text{V}(\mu_2\text{-Cl})(\eta^5\text{-Cp}(\text{CH}_2)_2\text{NMe}_2)]_2$ <sup>[2]</sup> and  $[\text{V}(\mu_2\text{-Cl})(\eta^5\text{-Cp})(\text{PEt}_3)]_2$ <sup>[3]</sup>; plane<sup>[4]</sup>: best-fit plane through corresponding atoms.

|                               | <b>2</b>   | $[\text{V}(\mu_2\text{-Cl})(\eta^5\text{-Cp}(\text{CH}_2)_2\text{NMe}_2)]_2$ <sup>[2]</sup> | $[\text{V}(\mu_2\text{-Cl})(\eta^5\text{-Cp})(\text{PEt}_3)]_2$ <sup>[3]</sup> |
|-------------------------------|------------|---------------------------------------------------------------------------------------------|--------------------------------------------------------------------------------|
| V1–V2                         | 3.4123(2)  | 3.0144(18)                                                                                  | 3.2452(22)                                                                     |
| V1–Cl1; V1–Cl2;               | 2.4564(3); | 2.4430(22); 2.4334(22);                                                                     | 2.4391(31); 2.4388(29);                                                        |
| V2–Cl1; V2–Cl2                | 2.4475(3)  | 2.4301(23); 2.4537(20)                                                                      | 2.4375(31); 2.4527(30)                                                         |
| V1–O1/N1/P1;                  | 2.1456(8)  | 2.2506(48); 2.2570(69)                                                                      | 2.5100(41); 2.5094(35)                                                         |
| V2–N2/P2                      |            |                                                                                             |                                                                                |
| V1–Cp(C1–C5);                 | 2.279(13)– | 2.252(69)–2.326(7);                                                                         | 2.2353(101)–2.2700(98);                                                        |
| V2–Cp(C6–C10)                 | 2.3036(12) | 2.2451(76)–2.3117(69)                                                                       | 2.2438(112)–<br>2.2839(103)                                                    |
| V1–plane <sub>C1–C5</sub> ;   | 1.9519(2)  | 1.9470(12); 1.9324(13)                                                                      | 1.9406(16); 1.9570(16)                                                         |
| V2–plane <sub>C6–C10</sub>    |            |                                                                                             |                                                                                |
| Cl1–V1–Cl2;                   | 91.815(10) | 92.778(70); 92.596(72)                                                                      | 87.179(93); 86.904(91)                                                         |
| Cl1–V2–Cl2                    |            |                                                                                             |                                                                                |
| V1–Cl1–V2; V1–                | 88.185(10) | 76.422(64); 76.164(65)                                                                      | 83.435(92); 83.124(92)                                                         |
| Cl2–V2                        |            |                                                                                             |                                                                                |
| O1/N1/P1–V1–                  | 89.78(2);  | 93.432(150); 93.798(141);                                                                   | 94.046(87); 94.843(90);                                                        |
| Cl1; O1/N1/P1–                | 89.39(2)   | 91.213(171); 100.215(180)                                                                   | 96.293(91); 91.508(87)                                                         |
| V1–Cl2; N2/P2–                |            |                                                                                             |                                                                                |
| V2–Cl2; N2/P2–                |            |                                                                                             |                                                                                |
| V2–Cl1;                       |            |                                                                                             |                                                                                |
| plane <sub>C1–C5</sub> –      | 0.000(67)  | 75.428(264)                                                                                 | 64.011(431)                                                                    |
| plane <sub>C6–C10</sub>       |            |                                                                                             |                                                                                |
| plane <sub>Cl1,V1,Cl2</sub> – | 0.000(5)   | 53.049(67)                                                                                  | 47.212(80)                                                                     |
| plane <sub>Cl1,V2,Cl2</sub>   |            |                                                                                             |                                                                                |

Table SI2: Selected interplanar and torsional angles [°] and interatomic distances [Å] for **3** and [CoCo]<sub>2</sub><sup>[5]</sup>, [CoCo]<sub>2</sub><sup>\*[5]</sup> and [NiNi]<sub>2</sub><sup>\*[6]</sup> obtained from X-ray structure analysis and from the structure optimization of the BS determinant with TPSSH / def2-TZVP; cent<sup>[4]</sup>: centroid of the corresponding Cp ligand; plane<sup>[4]</sup>: best-fit plane through corresponding atoms.

|                                        | <b>3</b>                 | <b>3</b> (DFT) | [CoCo] <sub>2</sub>       | [CoCo] <sub>2</sub> <sup>*</sup> | [NiNi] <sub>2</sub> <sup>*</sup> |
|----------------------------------------|--------------------------|----------------|---------------------------|----------------------------------|----------------------------------|
| M1–M1a                                 | 7.1212(3)                | 7.20           | 6.7392(4)                 | 6.7244(7)                        | 6.9705(3)                        |
| C7–C7a                                 | 2.9741(13)               | 3.04           | 2.9400(19)                | 3.0176(43)                       | 2.9873(23)                       |
| C1–C1a                                 | 2.5650(13)               | 2.56           | 2.5594(19)                | 2.5633(45)                       | 2.562(3)                         |
| C1–C7                                  | 1.4861(13)               | 1.48           | 1.4811(19);<br>1.4801(19) | 1.4814(39);<br>1.4824(37)        | 1.482(3);<br>1.478(3)            |
| M1–Cp <sub>C7–C16</sub>                | 2.2615(9)–<br>2.2934(10) | 2.27–2.30      | 2.0799(16)–<br>2.1782(14) | 2.0654(26)–<br>2.1753(26)        | 2.1527(15)–<br>2.2548(15)        |
| plane <sub>C7–C11</sub> <sup>–</sup>   | 26.677(42)               | 32.69          | 28.456(57)                | 33.734(107)                      | 31.480(73)                       |
| plane <sub>C7a–C11a</sub>              |                          |                |                           |                                  |                                  |
| plane <sub>C7–C11</sub> <sup>–</sup>   | 47.927(39)               | 42.57          | 40.280(48);<br>42.516(48) | 28.025(96);<br>28.967(93)        | 42.397(62);<br>42.893(63)        |
| plane <sub>C1–C6</sub>                 |                          |                |                           |                                  |                                  |
| cent <sub>C7–C11</sub> <sup>–</sup>    | 3.8579(1)                | 3.86           | 3.4593(1);<br>3.4587(1)   | 3.4425(2);<br>3.4396(2)          | 3.637(1);<br>3.629(1)            |
| cent <sub>C12–C16</sub>                |                          |                |                           |                                  |                                  |
| C7–C1–C1a–C7a                          | 27.188(76)               | 27.09          | 29.655(111)               | 36.799(229)                      | 27.564(134)                      |
| C7–cent <sub>C7–C11</sub> <sup>–</sup> | 20.770(69)               | 14.91          | 3.969(97);<br>17.876(97)  | 18.551(189);<br>15.703(186)      | 10.939(115);<br>31.447(111)      |
| cent <sub>C12–C16</sub> –C13           |                          |                |                           |                                  |                                  |
| C2–C3–C3a–C2a                          | 14.404(86)               | 12.55          | 15.037(121)               | 19.307(264)                      | 11.513(144)                      |
| M1–H2                                  | 3.2119(2)                | 3.14           | 3.3117(2);<br>3.3619(2)   | 3.5997(4);<br>3.6191 (4)         | 3.2245(2)–<br>3.2252(2)          |

Table SI3: Crystallographic Data and Experimental Parameter for Compounds **2** and **3**

| Compound (CCDC)                                                  | <b>2</b> (1554540)                                                            | <b>3</b> (1554539)                             |
|------------------------------------------------------------------|-------------------------------------------------------------------------------|------------------------------------------------|
| Empirical formula                                                | C <sub>18</sub> H <sub>26</sub> Cl <sub>2</sub> O <sub>2</sub> V <sub>2</sub> | C <sub>30</sub> H <sub>24</sub> V <sub>2</sub> |
| Formula weight                                                   | 447.17                                                                        | 486.37                                         |
| Temperature [K]                                                  | 100(2)                                                                        | 100(2)                                         |
| Wavelength [Å]                                                   | 0.71073                                                                       | 0.71073                                        |
| Crystal system                                                   | monoclinic                                                                    | monoclinic                                     |
| Space group                                                      | <i>P</i> 2 <sub>1</sub> / <i>c</i>                                            | <i>C</i> 2/ <i>c</i>                           |
| <i>a</i> [Å]                                                     | 8.1826 (1)                                                                    | 18.4035(4)                                     |
| <i>b</i> [Å]                                                     | 10.4231 (2)                                                                   | 10.1646(2)                                     |
| <i>c</i> [Å]                                                     | 11.7182 (2)                                                                   | 11.8559(3)                                     |
| $\alpha$ [°]                                                     | 90                                                                            | 90                                             |
| $\beta$ [°]                                                      | 104.37                                                                        | 90.2150(10)                                    |
| $\gamma$ [°]                                                     | 90                                                                            | 90                                             |
| Volume [Å <sup>3</sup> ]                                         | 968.15(3)                                                                     | 2217.80(9)                                     |
| <i>Z</i>                                                         | 2                                                                             | 4                                              |
| <i>D</i> <sub>calc</sub> [g/cm <sup>3</sup> ]                    | 1.534                                                                         | 1.457                                          |
| Absorption coefficient $\mu$ [mm <sup>-1</sup> ]                 | 1.249                                                                         | 0.859                                          |
| <i>F</i> (000)                                                   | 460                                                                           | 1000                                           |
| Crystal size [mm <sup>3</sup> ]                                  | 0.24 × 0.17 × 0.05                                                            | 0.22 × 0.16 × 0.04                             |
| $\Theta$ range for data collection [°]                           | 3.23 to 33.50                                                                 | 2.21 to 32.50                                  |
|                                                                  | -12 ≤ <i>h</i> ≤ 12                                                           | -27 ≤ <i>h</i> ≤ 27                            |
| Index ranges                                                     | -16 ≤ <i>k</i> ≤ 16                                                           | -15 ≤ <i>k</i> ≤ 15                            |
|                                                                  | -18 ≤ <i>l</i> ≤ 17                                                           | -17 ≤ <i>l</i> ≤ 17                            |
| Reflections collected                                            | 25226                                                                         | 25689                                          |
| Independent reflections ( <i>R</i> <sub>int</sub> )              | 3731 (0.0232)                                                                 | 3928 (0.0223)                                  |
| Completeness [%] (to $\Theta = [^\circ]$ )                       | 98.0 (33.50)                                                                  | 98.0 (32.50)                                   |
| Max. and min. transmission                                       | 0.9402, 0.7537                                                                | 0.9665, 0.8336                                 |
| Refinement method                                                | Full-matrix                                                                   | Full-matrix                                    |
|                                                                  | least-squares on <i>F</i> <sup>2</sup>                                        | least-squares on <i>F</i> <sup>2</sup>         |
| Data / restraints / parameters                                   | 3731 / 0 / 109                                                                | 3928 / 0 / 146                                 |
| Goodness-of-fit on <i>F</i> <sup>2</sup>                         | 1.037                                                                         | 1.031                                          |
| Final <i>R</i> indices [ <i>I</i> > 2 <i>sigma</i> ( <i>I</i> )] | <i>R</i> 1 = 0.0283,<br><i>wR</i> 2 = 0.0700                                  | <i>R</i> 1 = 0.0274,<br><i>wR</i> 2 = 0.0697   |
| <i>R</i> indices (all data)                                      | <i>R</i> 1 = 0.0312,<br><i>wR</i> 2 = 0.0720                                  | <i>R</i> 1 = 0.0315,<br><i>wR</i> 2 = 0.0729   |
| Largest diff. peak and hole [eÅ <sup>-3</sup> ]                  | 0.942, -0.309                                                                 | 0.517, -0.238                                  |

- [1] K. Jonas, W. Rüsseler, K. Angermund, C. Krüger, *Angew. Chem.* **1986**, *98*, 902–904.
- [2] G. Liu, X. Lu, M. Gagliardo, D. J. Beetstra, A. Meetsma, B. Hessen, *Organometallics* **2008**, *27*, 2316–2320.
- [3] J. Nieman, J. H. Teuben, F. B. Hulsbergen, R. A. G. de Graaff, J. Reedijk, *Inorg. Chem.* **1987**, *26*, 2376–2379.
- [4] K. Brandenburg, Diamond Version 3.1, Crystal Impact GbR, **1997–2005**.
- [5] N. Pagels, O. Albrecht, D. Görlitz, A. Y. Rogachev, M. H. Prosenc, J. Heck, *Chem.-Eur. J.* **2011**, *17*, 4166–4176.
- [6] S. Trtica, M. H. Prosenc, M. Schmidt, J. Heck, O. Albrecht, D. Görlitz, F. Reuter, E. Rentschler, *Inorg. Chem.* **2010**, *49*, 1667–1673.
